# Supplementary material for: Co and Ni single sites on the (111)n surface of γ-Al2O3 – a periodic boundary DFT study
Source: Royal Society of Chemistry journal article supplement (doi:10.1039/d2im00039c), 2023-01-01
Supplement: d2im00039c1.pdf [file d2im00039c1.pdf]

## Supporting Information (SI)

The coordinates of the optimized structures of the  $\text{Co}_1$  substituted  $(111)_n$  surface of the supercell.

### Singlet

|    |    |   |           |          |          |
|----|----|---|-----------|----------|----------|
| 1  | 13 | 0 | -0.364074 | 6.270984 | 1.001860 |
| 2  | 13 | 0 | -1.753138 | 6.179558 | 4.266303 |
| 3  | 13 | 0 | -0.489543 | 2.077312 | 2.216555 |
| 4  | 8  | 0 | -3.475381 | 6.255985 | 7.343605 |
| 5  | 8  | 0 | -0.912652 | 6.263731 | 2.675479 |
| 6  | 8  | 0 | 0.764546  | 2.074877 | 1.054831 |
| 7  | 8  | 0 | -2.173519 | 2.041510 | 4.956176 |
| 8  | 8  | 0 | -3.493839 | 3.484917 | 7.352525 |
| 9  | 8  | 0 | -3.485127 | 0.643741 | 7.342224 |
| 10 | 8  | 0 | -0.738527 | 0.581694 | 3.049717 |
| 11 | 8  | 0 | -0.762541 | 3.573754 | 3.050748 |
| 12 | 8  | 0 | 0.798980  | 4.956949 | 1.219079 |
| 13 | 8  | 0 | 0.813486  | 7.566104 | 1.219656 |
| 14 | 8  | 0 | -2.198034 | 7.600110 | 5.152866 |
| 15 | 8  | 0 | -2.332374 | 4.805476 | 5.147954 |
| 16 | 13 | 0 | 2.246079  | 6.255539 | 1.056943 |
| 17 | 13 | 0 | -2.607077 | 2.068123 | 6.737545 |
| 18 | 13 | 0 | -1.011823 | 0.631092 | 4.910046 |
| 19 | 13 | 0 | 0.727147  | 7.769671 | 3.165404 |
| 20 | 13 | 0 | 0.694472  | 4.765223 | 3.158753 |
| 21 | 13 | 0 | -1.051052 | 3.483719 | 4.907407 |
| 22 | 13 | 0 | -2.329445 | 4.823005 | 7.022192 |
| 23 | 13 | 0 | 2.088509  | 3.449631 | 1.043533 |
| 24 | 13 | 0 | 2.088042  | 0.696262 | 1.035748 |
| 25 | 13 | 0 | -2.307795 | 7.675835 | 7.025258 |
| 26 | 8  | 0 | 3.319829  | 2.074534 | 1.115983 |
| 27 | 8  | 0 | 0.424384  | 2.104156 | 5.032429 |
| 28 | 8  | 0 | -0.934460 | 6.249328 | 7.226793 |
| 29 | 8  | 0 | 1.870117  | 6.255113 | 3.033896 |
| 30 | 8  | 0 | 3.477917  | 4.918278 | 0.983949 |
| 31 | 8  | 0 | 3.489891  | 7.581125 | 0.981059 |
| 32 | 8  | 0 | 0.283403  | 7.602355 | 4.885152 |
| 33 | 8  | 0 | 0.083904  | 5.079125 | 4.834909 |
| 34 | 8  | 0 | -1.027824 | 3.355016 | 6.807388 |
| 35 | 8  | 0 | -1.016397 | 0.787038 | 6.817377 |
| 36 | 8  | 0 | 1.937750  | 0.691531 | 2.953311 |
| 37 | 8  | 0 | 1.913148  | 3.471972 | 2.972349 |
| 38 | 13 | 0 | 0.376990  | 2.078434 | 7.022456 |

|    |    |   |          |          |          |
|----|----|---|----------|----------|----------|
| 39 | 13 | 0 | 1.981300 | 2.069855 | 4.085142 |
| 40 | 13 | 0 | 0.487348 | 6.313274 | 6.124431 |
| 41 | 13 | 0 | 5.009477 | 6.242239 | 1.032577 |
| 42 | 13 | 0 | 3.394094 | 6.253696 | 3.995703 |
| 43 | 13 | 0 | 4.842190 | 2.021510 | 1.917652 |
| 44 | 8  | 0 | 2.013768 | 6.247735 | 6.911733 |
| 45 | 8  | 0 | 4.938597 | 6.226453 | 3.029774 |
| 46 | 8  | 0 | 6.290938 | 2.069613 | 0.835427 |
| 47 | 8  | 0 | 3.476404 | 2.068211 | 5.042276 |
| 48 | 8  | 0 | 1.915650 | 3.398253 | 7.078437 |
| 49 | 8  | 0 | 1.907662 | 0.746151 | 7.080597 |
| 50 | 8  | 0 | 5.118490 | 0.752759 | 3.179036 |
| 51 | 8  | 0 | 5.257808 | 3.259650 | 3.208824 |
| 52 | 8  | 0 | 6.404279 | 4.969164 | 1.256511 |
| 53 | 8  | 0 | 6.397580 | 7.529765 | 1.248483 |
| 54 | 8  | 0 | 3.451810 | 7.656033 | 5.107364 |
| 55 | 8  | 0 | 3.457723 | 4.832184 | 5.094559 |
| 56 | 13 | 0 | 7.987056 | 6.252925 | 1.347377 |
| 57 | 13 | 0 | 3.173293 | 2.067097 | 7.035023 |
| 58 | 13 | 0 | 4.676464 | 0.597467 | 4.921604 |
| 59 | 13 | 0 | 6.377633 | 7.684223 | 3.158840 |
| 60 | 13 | 0 | 6.404193 | 4.836547 | 3.160406 |
| 61 | 13 | 0 | 4.690402 | 3.521287 | 4.924327 |
| 62 | 13 | 0 | 3.230618 | 4.882910 | 7.006795 |
| 63 | 13 | 0 | 7.693213 | 3.495963 | 1.050229 |
| 64 | 13 | 0 | 7.678693 | 0.645021 | 1.046864 |
| 65 | 13 | 0 | 3.234705 | 7.617843 | 7.010132 |
| 66 | 8  | 0 | 8.829510 | 2.066432 | 0.742085 |
| 67 | 8  | 0 | 6.074876 | 2.055101 | 5.327156 |
| 68 | 8  | 0 | 4.567582 | 6.246148 | 6.990909 |
| 69 | 8  | 0 | 7.538311 | 6.270933 | 3.115914 |
| 70 | 8  | 0 | 8.852632 | 4.838055 | 0.699365 |
| 71 | 8  | 0 | 8.847933 | 7.671771 | 0.704674 |
| 72 | 8  | 0 | 6.114560 | 7.738384 | 5.017054 |
| 73 | 8  | 0 | 6.125046 | 4.748834 | 5.015194 |
| 74 | 8  | 0 | 4.608231 | 3.329617 | 6.843358 |
| 75 | 8  | 0 | 4.597016 | 0.795418 | 6.842544 |
| 76 | 8  | 0 | 7.582473 | 0.701646 | 2.918496 |
| 77 | 8  | 0 | 7.674267 | 3.503976 | 2.922083 |
| 78 | 27 | 0 | 5.814040 | 2.055698 | 7.106371 |
| 79 | 13 | 0 | 7.044512 | 2.120611 | 3.758851 |
| 80 | 13 | 0 | 5.851228 | 6.244813 | 5.856004 |

triplet

|    |    |   |           |          |          |
|----|----|---|-----------|----------|----------|
| 1  | 13 | 0 | -0.372042 | 6.264007 | 1.007553 |
| 2  | 13 | 0 | -1.715275 | 6.240153 | 4.287822 |
| 3  | 13 | 0 | -0.481154 | 2.070902 | 2.217335 |
| 4  | 8  | 0 | -3.470294 | 6.258323 | 7.331447 |
| 5  | 8  | 0 | -0.880466 | 6.255672 | 2.695055 |
| 6  | 8  | 0 | 0.749639  | 2.072014 | 1.030595 |
| 7  | 8  | 0 | -2.155658 | 2.066121 | 4.956805 |
| 8  | 8  | 0 | -3.493573 | 3.496338 | 7.330590 |
| 9  | 8  | 0 | -3.492278 | 0.647894 | 7.330617 |
| 10 | 8  | 0 | -0.734675 | 0.575916 | 3.055683 |
| 11 | 8  | 0 | -0.742975 | 3.566924 | 3.053015 |
| 12 | 8  | 0 | 0.797231  | 4.955231 | 1.206983 |
| 13 | 8  | 0 | 0.803877  | 7.563063 | 1.211252 |
| 14 | 8  | 0 | -2.241681 | 7.646881 | 5.146040 |
| 15 | 8  | 0 | -2.271987 | 4.844521 | 5.144879 |
| 16 | 13 | 0 | 2.238825  | 6.255419 | 1.045793 |
| 17 | 13 | 0 | -2.610200 | 2.072394 | 6.734402 |
| 18 | 13 | 0 | -1.014234 | 0.639318 | 4.909460 |
| 19 | 13 | 0 | 0.729019  | 7.757372 | 3.166096 |
| 20 | 13 | 0 | 0.711048  | 4.762200 | 3.156649 |
| 21 | 13 | 0 | -1.023554 | 3.499352 | 4.906978 |
| 22 | 13 | 0 | -2.319012 | 4.831163 | 7.014555 |
| 23 | 13 | 0 | 2.073785  | 3.450310 | 1.020986 |
| 24 | 13 | 0 | 2.075101  | 0.693702 | 1.021784 |
| 25 | 13 | 0 | -2.312780 | 7.681404 | 7.016371 |
| 26 | 8  | 0 | 3.304227  | 2.072842 | 1.094255 |
| 27 | 8  | 0 | 0.449104  | 2.081669 | 5.040394 |
| 28 | 8  | 0 | -0.917283 | 6.254692 | 7.211884 |
| 29 | 8  | 0 | 1.878702  | 6.254977 | 3.023573 |
| 30 | 8  | 0 | 3.476179  | 4.922886 | 0.966639 |
| 31 | 8  | 0 | 3.480466  | 7.583023 | 0.967093 |
| 32 | 8  | 0 | 0.227544  | 7.535510 | 4.878787 |
| 33 | 8  | 0 | 0.178487  | 5.017175 | 4.862117 |
| 34 | 8  | 0 | -1.021373 | 3.359238 | 6.808184 |
| 35 | 8  | 0 | -1.022065 | 0.788327 | 6.811274 |
| 36 | 8  | 0 | 1.922477  | 0.690990 | 2.942548 |
| 37 | 8  | 0 | 1.913116  | 3.462477 | 2.943000 |
| 38 | 13 | 0 | 0.350894  | 2.072988 | 7.029476 |
| 39 | 13 | 0 | 1.996772  | 2.075994 | 4.061159 |
| 40 | 13 | 0 | 0.544900  | 6.266401 | 6.143362 |
| 41 | 13 | 0 | 4.984626  | 6.247126 | 1.030912 |
| 42 | 13 | 0 | 3.402308  | 6.248294 | 4.000415 |
| 43 | 13 | 0 | 4.797107  | 2.056895 | 1.955830 |

|    |    |   |          |          |          |
|----|----|---|----------|----------|----------|
| 44 | 8  | 0 | 2.082449 | 6.247632 | 6.940953 |
| 45 | 8  | 0 | 4.935304 | 6.243000 | 3.021914 |
| 46 | 8  | 0 | 6.240280 | 2.067173 | 0.846731 |
| 47 | 8  | 0 | 3.473558 | 2.067826 | 5.035004 |
| 48 | 8  | 0 | 1.884251 | 3.349612 | 7.150247 |
| 49 | 8  | 0 | 1.875600 | 0.786491 | 7.142309 |
| 50 | 8  | 0 | 5.127954 | 0.773909 | 3.189616 |
| 51 | 8  | 0 | 5.170229 | 3.328616 | 3.197410 |
| 52 | 8  | 0 | 6.368749 | 4.984949 | 1.243802 |
| 53 | 8  | 0 | 6.363622 | 7.514307 | 1.239325 |
| 54 | 8  | 0 | 3.479753 | 7.649520 | 5.104149 |
| 55 | 8  | 0 | 3.483375 | 4.843568 | 5.102211 |
| 56 | 13 | 0 | 7.982199 | 6.250701 | 1.345016 |
| 57 | 13 | 0 | 3.212335 | 2.064161 | 6.936787 |
| 58 | 13 | 0 | 4.726503 | 0.611965 | 4.969330 |
| 59 | 13 | 0 | 6.357072 | 7.674254 | 3.159123 |
| 60 | 13 | 0 | 6.367413 | 4.832543 | 3.163238 |
| 61 | 13 | 0 | 4.735740 | 3.514218 | 4.973504 |
| 62 | 13 | 0 | 3.351576 | 4.873819 | 7.042125 |
| 63 | 13 | 0 | 7.563895 | 3.550579 | 1.017429 |
| 64 | 13 | 0 | 7.553001 | 0.582764 | 1.009904 |
| 65 | 13 | 0 | 3.349327 | 7.623832 | 7.038970 |
| 66 | 8  | 0 | 8.727932 | 2.064616 | 0.718534 |
| 67 | 8  | 0 | 6.121518 | 2.060868 | 5.269413 |
| 68 | 8  | 0 | 4.650812 | 6.249085 | 7.043590 |
| 69 | 8  | 0 | 7.519486 | 6.257169 | 3.103942 |
| 70 | 8  | 0 | 8.836704 | 4.815097 | 0.728720 |
| 71 | 8  | 0 | 8.831372 | 7.687743 | 0.725765 |
| 72 | 8  | 0 | 6.145288 | 7.738799 | 5.018190 |
| 73 | 8  | 0 | 6.151395 | 4.756006 | 5.021636 |
| 74 | 8  | 0 | 4.523348 | 3.383365 | 6.864672 |
| 75 | 8  | 0 | 4.518116 | 0.743114 | 6.862513 |
| 76 | 8  | 0 | 7.585318 | 0.677663 | 2.871659 |
| 77 | 8  | 0 | 7.615145 | 3.474432 | 2.877995 |
| 78 | 27 | 0 | 5.914727 | 2.058115 | 7.187695 |
| 79 | 13 | 0 | 7.043129 | 2.079946 | 3.740371 |
| 80 | 13 | 0 | 5.886233 | 6.248521 | 5.856197 |

quintet

|    |    |   |           |          |          |
|----|----|---|-----------|----------|----------|
| 1  | 13 | 0 | -0.371036 | 6.263568 | 1.008661 |
| 2  | 13 | 0 | -1.714109 | 6.239073 | 4.288277 |
| 3  | 13 | 0 | -0.482243 | 2.071453 | 2.218438 |
| 4  | 8  | 0 | -3.469074 | 6.258474 | 7.330266 |
| 5  | 8  | 0 | -0.878969 | 6.256598 | 2.695947 |
| 6  | 8  | 0 | 0.748428  | 2.071944 | 1.031497 |
| 7  | 8  | 0 | -2.156039 | 2.065584 | 4.955398 |
| 8  | 8  | 0 | -3.495318 | 3.496073 | 7.329347 |
| 9  | 8  | 0 | -3.493093 | 0.647704 | 7.329133 |
| 10 | 8  | 0 | -0.734879 | 0.575703 | 3.055801 |
| 11 | 8  | 0 | -0.742682 | 3.568353 | 3.053289 |
| 12 | 8  | 0 | 0.798397  | 4.955233 | 1.207120 |
| 13 | 8  | 0 | 0.804523  | 7.562999 | 1.210678 |
| 14 | 8  | 0 | -2.239392 | 7.646000 | 5.146408 |
| 15 | 8  | 0 | -2.272241 | 4.843761 | 5.144530 |
| 16 | 13 | 0 | 2.239420  | 6.255593 | 1.044702 |
| 17 | 13 | 0 | -2.612019 | 2.072344 | 6.732394 |
| 18 | 13 | 0 | -1.013511 | 0.639000 | 4.909594 |
| 19 | 13 | 0 | 0.729667  | 7.757542 | 3.165944 |
| 20 | 13 | 0 | 0.713249  | 4.762098 | 3.157560 |
| 21 | 13 | 0 | -1.023756 | 3.499329 | 4.906831 |
| 22 | 13 | 0 | -2.319084 | 4.830604 | 7.014407 |
| 23 | 13 | 0 | 2.073105  | 3.450089 | 1.019988 |
| 24 | 13 | 0 | 2.073729  | 0.693580 | 1.020378 |
| 25 | 13 | 0 | -2.311573 | 7.681726 | 7.016683 |
| 26 | 8  | 0 | 3.303039  | 2.072467 | 1.092525 |
| 27 | 8  | 0 | 0.449560  | 2.081424 | 5.040380 |
| 28 | 8  | 0 | -0.916244 | 6.254370 | 7.211655 |
| 29 | 8  | 0 | 1.879816  | 6.255065 | 3.022664 |
| 30 | 8  | 0 | 3.475695  | 4.922236 | 0.965260 |
| 31 | 8  | 0 | 3.480317  | 7.583789 | 0.965541 |
| 32 | 8  | 0 | 0.231148  | 7.537280 | 4.879732 |
| 33 | 8  | 0 | 0.179202  | 5.017919 | 4.862726 |
| 34 | 8  | 0 | -1.022378 | 3.359093 | 6.807382 |
| 35 | 8  | 0 | -1.021479 | 0.788170 | 6.811044 |
| 36 | 8  | 0 | 1.923442  | 0.690820 | 2.941253 |
| 37 | 8  | 0 | 1.914173  | 3.461797 | 2.942142 |
| 38 | 13 | 0 | 0.350054  | 2.074203 | 7.030084 |
| 39 | 13 | 0 | 1.996864  | 2.075259 | 4.060395 |
| 40 | 13 | 0 | 0.547158  | 6.267287 | 6.144359 |
| 41 | 13 | 0 | 4.984607  | 6.247156 | 1.029524 |
| 42 | 13 | 0 | 3.402503  | 6.248979 | 4.001283 |

|    |    |   |          |          |          |
|----|----|---|----------|----------|----------|
| 43 | 13 | 0 | 4.794631 | 2.055355 | 1.955898 |
| 44 | 8  | 0 | 2.084755 | 6.248127 | 6.942341 |
| 45 | 8  | 0 | 4.933684 | 6.243576 | 3.019563 |
| 46 | 8  | 0 | 6.238370 | 2.067282 | 0.847147 |
| 47 | 8  | 0 | 3.473160 | 2.068471 | 5.035396 |
| 48 | 8  | 0 | 1.884265 | 3.351452 | 7.148504 |
| 49 | 8  | 0 | 1.875637 | 0.787032 | 7.144322 |
| 50 | 8  | 0 | 5.127518 | 0.772997 | 3.189564 |
| 51 | 8  | 0 | 5.170868 | 3.326454 | 3.197384 |
| 52 | 8  | 0 | 6.367321 | 4.984657 | 1.242416 |
| 53 | 8  | 0 | 6.363310 | 7.513612 | 1.238539 |
| 54 | 8  | 0 | 3.479853 | 7.650565 | 5.105389 |
| 55 | 8  | 0 | 3.483844 | 4.843874 | 5.102906 |
| 56 | 13 | 0 | 7.981357 | 6.250200 | 1.345799 |
| 57 | 13 | 0 | 3.212404 | 2.065396 | 6.936953 |
| 58 | 13 | 0 | 4.727294 | 0.612946 | 4.970778 |
| 59 | 13 | 0 | 6.355609 | 7.673701 | 3.159287 |
| 60 | 13 | 0 | 6.365146 | 4.832054 | 3.161746 |
| 61 | 13 | 0 | 4.735549 | 3.513773 | 4.974001 |
| 62 | 13 | 0 | 3.352780 | 4.873768 | 7.043443 |
| 63 | 13 | 0 | 7.561835 | 3.549723 | 1.016188 |
| 64 | 13 | 0 | 7.551763 | 0.582257 | 1.011473 |
| 65 | 13 | 0 | 3.352428 | 7.623912 | 7.041782 |
| 66 | 8  | 0 | 8.726414 | 2.063209 | 0.719104 |
| 67 | 8  | 0 | 6.119874 | 2.059787 | 5.268948 |
| 68 | 8  | 0 | 4.653091 | 6.249094 | 7.044921 |
| 69 | 8  | 0 | 7.517501 | 6.256419 | 3.104590 |
| 70 | 8  | 0 | 8.835143 | 4.814141 | 0.729747 |
| 71 | 8  | 0 | 8.830886 | 7.687597 | 0.727889 |
| 72 | 8  | 0 | 6.145098 | 7.739029 | 5.018372 |
| 73 | 8  | 0 | 6.149046 | 4.756693 | 5.020127 |
| 74 | 8  | 0 | 4.525167 | 3.384185 | 6.866093 |
| 75 | 8  | 0 | 4.519794 | 0.744493 | 6.864091 |
| 76 | 8  | 0 | 7.584256 | 0.677030 | 2.871918 |
| 77 | 8  | 0 | 7.614322 | 3.474357 | 2.876738 |
| 78 | 27 | 0 | 5.916724 | 2.060262 | 7.190217 |
| 79 | 13 | 0 | 7.040085 | 2.080073 | 3.738333 |
| 80 | 13 | 0 | 5.887824 | 6.248780 | 5.856518 |

septet

|    |    |   |           |          |          |
|----|----|---|-----------|----------|----------|
| 1  | 13 | 0 | -0.551214 | 6.262861 | 0.929448 |
| 2  | 13 | 0 | -1.718462 | 6.244588 | 4.280000 |
| 3  | 13 | 0 | -0.567233 | 2.073491 | 2.186315 |
| 4  | 8  | 0 | -3.358086 | 6.260520 | 7.339679 |
| 5  | 8  | 0 | -0.723593 | 6.260497 | 2.787972 |
| 6  | 8  | 0 | 0.680483  | 2.073479 | 1.004782 |
| 7  | 8  | 0 | -2.132749 | 2.067901 | 4.964575 |
| 8  | 8  | 0 | -3.477104 | 3.519214 | 7.316835 |
| 9  | 8  | 0 | -3.473537 | 0.626893 | 7.317364 |
| 10 | 8  | 0 | -0.756632 | 0.585110 | 3.057008 |
| 11 | 8  | 0 | -0.763544 | 3.563294 | 3.055077 |
| 12 | 8  | 0 | 0.793712  | 4.981292 | 1.196855 |
| 13 | 8  | 0 | 0.799320  | 7.534545 | 1.198415 |
| 14 | 8  | 0 | -2.196863 | 7.644604 | 5.177247 |
| 15 | 8  | 0 | -2.224030 | 4.853333 | 5.176270 |
| 16 | 13 | 0 | 2.170448  | 6.254775 | 1.134519 |
| 17 | 13 | 0 | -2.628005 | 2.073637 | 6.714449 |
| 18 | 13 | 0 | -0.971680 | 0.650289 | 4.907936 |
| 19 | 13 | 0 | 0.672691  | 7.718314 | 3.126431 |
| 20 | 13 | 0 | 0.663048  | 4.798521 | 3.122274 |
| 21 | 13 | 0 | -0.980539 | 3.492038 | 4.906169 |
| 22 | 13 | 0 | -2.193336 | 4.775729 | 7.038745 |
| 23 | 13 | 0 | 1.977713  | 3.451021 | 0.996699 |
| 24 | 13 | 0 | 1.974568  | 0.695059 | 0.996125 |
| 25 | 13 | 0 | -2.186142 | 7.738997 | 7.038884 |
| 26 | 8  | 0 | 3.248821  | 2.072045 | 1.086548 |
| 27 | 8  | 0 | 0.458354  | 2.079265 | 5.053820 |
| 28 | 8  | 0 | -0.866418 | 6.254455 | 7.215811 |
| 29 | 8  | 0 | 1.915671  | 6.254743 | 3.034114 |
| 30 | 8  | 0 | 3.468289  | 4.965000 | 0.907430 |
| 31 | 8  | 0 | 3.474594  | 7.536697 | 0.906091 |
| 32 | 8  | 0 | 0.281822  | 7.566544 | 4.897860 |
| 33 | 8  | 0 | 0.242970  | 4.976451 | 4.888446 |
| 34 | 8  | 0 | -0.996809 | 3.344516 | 6.820317 |
| 35 | 8  | 0 | -0.993771 | 0.803386 | 6.823041 |
| 36 | 8  | 0 | 1.887405  | 0.673419 | 2.919751 |
| 37 | 8  | 0 | 1.882182  | 3.475639 | 2.922231 |
| 38 | 13 | 0 | 0.370430  | 2.076338 | 7.033685 |
| 39 | 13 | 0 | 1.973539  | 2.072858 | 4.026178 |
| 40 | 13 | 0 | 0.592792  | 6.264679 | 6.118278 |
| 41 | 13 | 0 | 4.998640  | 6.245416 | 1.032026 |
| 42 | 13 | 0 | 3.399872  | 6.249475 | 4.024017 |
| 43 | 13 | 0 | 4.757578  | 2.055467 | 1.940897 |

|    |    |   |          |          |          |
|----|----|---|----------|----------|----------|
| 44 | 8  | 0 | 2.103140 | 6.249633 | 6.974819 |
| 45 | 8  | 0 | 4.918195 | 6.241927 | 3.006708 |
| 46 | 8  | 0 | 6.227066 | 2.067650 | 0.855776 |
| 47 | 8  | 0 | 3.452784 | 2.067667 | 5.025922 |
| 48 | 8  | 0 | 1.885601 | 3.353122 | 7.159807 |
| 49 | 8  | 0 | 1.879071 | 0.788636 | 7.159689 |
| 50 | 8  | 0 | 5.104579 | 0.766002 | 3.176114 |
| 51 | 8  | 0 | 5.152026 | 3.329456 | 3.186064 |
| 52 | 8  | 0 | 6.362436 | 4.977570 | 1.242438 |
| 53 | 8  | 0 | 6.358241 | 7.519253 | 1.238969 |
| 54 | 8  | 0 | 3.495084 | 7.642292 | 5.128460 |
| 55 | 8  | 0 | 3.502112 | 4.852878 | 5.125030 |
| 56 | 13 | 0 | 7.982029 | 6.249370 | 1.336788 |
| 57 | 13 | 0 | 3.211235 | 2.066775 | 6.924983 |
| 58 | 13 | 0 | 4.714270 | 0.612818 | 4.967483 |
| 59 | 13 | 0 | 6.350026 | 7.674360 | 3.156378 |
| 60 | 13 | 0 | 6.360832 | 4.830048 | 3.158768 |
| 61 | 13 | 0 | 4.723964 | 3.513470 | 4.971506 |
| 62 | 13 | 0 | 3.366815 | 4.872292 | 7.059406 |
| 63 | 13 | 0 | 7.564268 | 3.544308 | 1.020521 |
| 64 | 13 | 0 | 7.555061 | 0.586570 | 1.018829 |
| 65 | 13 | 0 | 3.368536 | 7.625646 | 7.059613 |
| 66 | 8  | 0 | 8.731491 | 2.062344 | 0.719759 |
| 67 | 8  | 0 | 6.095210 | 2.060722 | 5.264776 |
| 68 | 8  | 0 | 4.673796 | 6.248838 | 7.070219 |
| 69 | 8  | 0 | 7.507332 | 6.256062 | 3.094358 |
| 70 | 8  | 0 | 8.841994 | 4.807466 | 0.746414 |
| 71 | 8  | 0 | 8.837488 | 7.692755 | 0.745756 |
| 72 | 8  | 0 | 6.140480 | 7.737379 | 5.009536 |
| 73 | 8  | 0 | 6.148425 | 4.756652 | 5.011836 |
| 74 | 8  | 0 | 4.515357 | 3.376846 | 6.868609 |
| 75 | 8  | 0 | 4.510106 | 0.752153 | 6.867412 |
| 76 | 8  | 0 | 7.572324 | 0.679736 | 2.879816 |
| 77 | 8  | 0 | 7.604493 | 3.471135 | 2.882213 |
| 78 | 27 | 0 | 5.905830 | 2.059065 | 7.202091 |
| 79 | 13 | 0 | 7.017356 | 2.081148 | 3.736069 |
| 80 | 13 | 0 | 5.883330 | 6.247633 | 5.856097 |



The coordinates of the optimized structures of the Ni<sub>I</sub> substituted (111)<sub>n</sub> surface of the supercell.

doublet

|    |    |   |           |          |          |
|----|----|---|-----------|----------|----------|
| 1  | 13 | 0 | -0.369276 | 6.263354 | 1.009302 |
| 2  | 13 | 0 | -1.711086 | 6.237566 | 4.289740 |
| 3  | 13 | 0 | -0.483123 | 2.071871 | 2.218409 |
| 4  | 8  | 0 | -3.467122 | 6.258414 | 7.330429 |
| 5  | 8  | 0 | -0.876312 | 6.257383 | 2.697082 |
| 6  | 8  | 0 | 0.749025  | 2.071977 | 1.032887 |
| 7  | 8  | 0 | -2.155718 | 2.064891 | 4.955453 |
| 8  | 8  | 0 | -3.495280 | 3.496085 | 7.328644 |
| 9  | 8  | 0 | -3.492550 | 0.647117 | 7.328179 |
| 10 | 8  | 0 | -0.733873 | 0.576051 | 3.056464 |
| 11 | 8  | 0 | -0.741761 | 3.568967 | 3.054019 |
| 12 | 8  | 0 | 0.800207  | 4.955206 | 1.207712 |
| 13 | 8  | 0 | 0.806452  | 7.562647 | 1.210982 |
| 14 | 8  | 0 | -2.236161 | 7.644665 | 5.147479 |
| 15 | 8  | 0 | -2.271591 | 4.842890 | 5.145260 |
| 16 | 13 | 0 | 2.241452  | 6.255665 | 1.045166 |
| 17 | 13 | 0 | -2.612565 | 2.072191 | 6.731973 |
| 18 | 13 | 0 | -1.012550 | 0.638707 | 4.910274 |
| 19 | 13 | 0 | 0.731282  | 7.757590 | 3.166218 |
| 20 | 13 | 0 | 0.715661  | 4.762044 | 3.158550 |
| 21 | 13 | 0 | -1.023509 | 3.498904 | 4.907422 |
| 22 | 13 | 0 | -2.317837 | 4.830097 | 7.014897 |
| 23 | 13 | 0 | 2.074058  | 3.450020 | 1.019670 |
| 24 | 13 | 0 | 2.074358  | 0.693455 | 1.019664 |
| 25 | 13 | 0 | -2.309645 | 7.681731 | 7.017286 |
| 26 | 8  | 0 | 3.303811  | 2.072188 | 1.089958 |
| 27 | 8  | 0 | 0.449829  | 2.081702 | 5.042030 |
| 28 | 8  | 0 | -0.914348 | 6.254163 | 7.211201 |
| 29 | 8  | 0 | 1.882161  | 6.255088 | 3.024066 |
| 30 | 8  | 0 | 3.476621  | 4.921449 | 0.963440 |
| 31 | 8  | 0 | 3.481805  | 7.584461 | 0.963355 |
| 32 | 8  | 0 | 0.235200  | 7.538913 | 4.880898 |
| 33 | 8  | 0 | 0.179738  | 5.019418 | 4.863360 |
| 34 | 8  | 0 | -1.021676 | 3.358502 | 6.807521 |
| 35 | 8  | 0 | -1.019755 | 0.788171 | 6.811556 |
| 36 | 8  | 0 | 1.925462  | 0.690597 | 2.940588 |
| 37 | 8  | 0 | 1.916384  | 3.461645 | 2.942468 |
| 38 | 13 | 0 | 0.351564  | 2.074688 | 7.029593 |
| 39 | 13 | 0 | 1.995775  | 2.074596 | 4.060462 |

|    |    |   |          |          |          |
|----|----|---|----------|----------|----------|
| 40 | 13 | 0 | 0.549883 | 6.268558 | 6.145330 |
| 43 | 13 | 0 | 4.796086 | 2.054531 | 1.953106 |
| 44 | 8  | 0 | 2.085912 | 6.248332 | 6.946862 |
| 45 | 8  | 0 | 4.929786 | 6.243775 | 3.017407 |
| 46 | 8  | 0 | 6.241582 | 2.067247 | 0.844971 |
| 47 | 8  | 0 | 3.468567 | 2.068045 | 5.038107 |
| 48 | 8  | 0 | 1.890987 | 3.353062 | 7.148961 |
| 49 | 8  | 0 | 1.882849 | 0.786606 | 7.145937 |
| 50 | 8  | 0 | 5.122993 | 0.769399 | 3.184485 |
| 51 | 8  | 0 | 5.164956 | 3.329236 | 3.191937 |
| 52 | 8  | 0 | 6.367269 | 4.983448 | 1.241939 |
| 53 | 8  | 0 | 6.364618 | 7.513670 | 1.238379 |
| 54 | 8  | 0 | 3.475471 | 7.652839 | 5.110142 |
| 55 | 8  | 0 | 3.479184 | 4.842043 | 5.106910 |
| 56 | 13 | 0 | 7.982112 | 6.250228 | 1.348706 |
| 57 | 13 | 0 | 3.214343 | 2.065927 | 6.936777 |
| 58 | 13 | 0 | 4.723910 | 0.612137 | 4.965198 |
| 59 | 13 | 0 | 6.352636 | 7.672195 | 3.158492 |
| 60 | 13 | 0 | 6.360985 | 4.832458 | 3.159898 |
| 61 | 13 | 0 | 4.732412 | 3.515399 | 4.968266 |
| 62 | 13 | 0 | 3.354240 | 4.875770 | 7.047919 |
| 63 | 13 | 0 | 7.562963 | 3.549089 | 1.018783 |
| 64 | 13 | 0 | 7.553662 | 0.582823 | 1.014840 |
| 65 | 13 | 0 | 3.355032 | 7.622071 | 7.046961 |
| 66 | 8  | 0 | 8.730940 | 2.063242 | 0.719019 |
| 67 | 8  | 0 | 6.090441 | 2.061615 | 5.266443 |
| 68 | 8  | 0 | 4.654400 | 6.249431 | 7.043214 |
| 69 | 8  | 0 | 7.514684 | 6.255600 | 3.104801 |
| 70 | 8  | 0 | 8.836301 | 4.813879 | 0.733583 |
| 71 | 8  | 0 | 8.832499 | 7.687797 | 0.731857 |
| 72 | 8  | 0 | 6.141570 | 7.737518 | 5.014903 |
| 73 | 8  | 0 | 6.144375 | 4.760512 | 5.015254 |
| 74 | 8  | 0 | 4.535171 | 3.385473 | 6.862500 |
| 75 | 8  | 0 | 4.529414 | 0.743157 | 6.860861 |
| 76 | 8  | 0 | 7.581862 | 0.677718 | 2.876711 |
| 77 | 8  | 0 | 7.611248 | 3.473005 | 2.880863 |
| 78 | 28 | 0 | 5.877304 | 2.059349 | 7.159541 |
| 79 | 13 | 0 | 7.045479 | 2.079797 | 3.750117 |
| 80 | 13 | 0 | 5.896676 | 6.249512 | 5.861363 |

## quartet

|    |    |   |           |          |          |
|----|----|---|-----------|----------|----------|
| 1  | 13 | 0 | -0.368811 | 6.263744 | 1.010096 |
| 2  | 13 | 0 | -1.708270 | 6.235146 | 4.290981 |
| 3  | 13 | 0 | -0.483750 | 2.073006 | 2.218902 |
| 4  | 8  | 0 | -3.466505 | 6.258984 | 7.329759 |
| 5  | 8  | 0 | -0.873051 | 6.259373 | 2.698753 |
| 6  | 8  | 0 | 0.748004  | 2.072836 | 1.032743 |
| 7  | 8  | 0 | -2.154970 | 2.064121 | 4.953597 |
| 8  | 8  | 0 | -3.496983 | 3.496494 | 7.327539 |
| 9  | 8  | 0 | -3.493165 | 0.646961 | 7.325799 |
| 10 | 8  | 0 | -0.732181 | 0.576946 | 3.057012 |
| 11 | 8  | 0 | -0.741253 | 3.570464 | 3.054539 |
| 12 | 8  | 0 | 0.800437  | 4.955347 | 1.207919 |
| 13 | 8  | 0 | 0.807220  | 7.563134 | 1.210230 |
| 14 | 8  | 0 | -2.231667 | 7.643117 | 5.147935 |
| 15 | 8  | 0 | -2.273190 | 4.841459 | 5.144871 |
| 16 | 13 | 0 | 2.241906  | 6.256310 | 1.044703 |
| 17 | 13 | 0 | -2.614512 | 2.072838 | 6.729520 |
| 18 | 13 | 0 | -1.010189 | 0.638619 | 4.910817 |
| 19 | 13 | 0 | 0.732349  | 7.758177 | 3.166090 |
| 20 | 13 | 0 | 0.717162  | 4.762681 | 3.159200 |
| 21 | 13 | 0 | -1.023540 | 3.499072 | 4.907445 |
| 22 | 13 | 0 | -2.318430 | 4.830185 | 7.014339 |
| 23 | 13 | 0 | 2.073940  | 3.450636 | 1.019005 |
| 24 | 13 | 0 | 2.073020  | 0.694300 | 1.017737 |
| 25 | 13 | 0 | -2.308084 | 7.682201 | 7.017391 |
| 26 | 8  | 0 | 3.302826  | 2.072414 | 1.088614 |
| 27 | 8  | 0 | 0.450380  | 2.083418 | 5.042224 |
| 28 | 8  | 0 | -0.913439 | 6.254465 | 7.209785 |
| 29 | 8  | 0 | 1.883371  | 6.255635 | 3.024240 |
| 30 | 8  | 0 | 3.476247  | 4.921562 | 0.961132 |
| 31 | 8  | 0 | 3.482652  | 7.584830 | 0.960487 |
| 32 | 8  | 0 | 0.241455  | 7.542902 | 4.882563 |
| 33 | 8  | 0 | 0.177255  | 5.023008 | 4.863056 |
| 34 | 8  | 0 | -1.023797 | 3.358346 | 6.806588 |
| 35 | 8  | 0 | -1.019105 | 0.789729 | 6.811263 |
| 36 | 8  | 0 | 1.926571  | 0.691001 | 2.939607 |
| 37 | 8  | 0 | 1.917326  | 3.461965 | 2.942956 |
| 38 | 13 | 0 | 0.351361  | 2.077730 | 7.029886 |
| 39 | 13 | 0 | 1.996553  | 2.074196 | 4.060548 |
| 40 | 13 | 0 | 0.551702  | 6.270825 | 6.145675 |
| 41 | 13 | 0 | 4.984344  | 6.246965 | 1.026685 |
| 42 | 13 | 0 | 3.403125  | 6.250431 | 4.008062 |

|    |    |   |          |          |          |
|----|----|---|----------|----------|----------|
| 43 | 13 | 0 | 4.794627 | 2.051598 | 1.952536 |
| 44 | 8  | 0 | 2.086831 | 6.249893 | 6.949001 |
| 45 | 8  | 0 | 4.927888 | 6.242443 | 3.015930 |
| 46 | 8  | 0 | 6.240008 | 2.066955 | 0.844618 |
| 47 | 8  | 0 | 3.468785 | 2.067333 | 5.039024 |
| 48 | 8  | 0 | 1.890690 | 3.355167 | 7.147682 |
| 49 | 8  | 0 | 1.884035 | 0.788759 | 7.149753 |
| 50 | 8  | 0 | 5.119836 | 0.766615 | 3.184401 |
| 51 | 8  | 0 | 5.164080 | 3.326460 | 3.191914 |
| 52 | 8  | 0 | 6.365481 | 4.981851 | 1.239733 |
| 53 | 8  | 0 | 6.363614 | 7.513963 | 1.237842 |
| 54 | 8  | 0 | 3.474889 | 7.652926 | 5.112721 |
| 55 | 8  | 0 | 3.478732 | 4.842090 | 5.107971 |
| 56 | 13 | 0 | 7.982096 | 6.248338 | 1.348505 |
| 57 | 13 | 0 | 3.215327 | 2.067880 | 6.939090 |
| 58 | 13 | 0 | 4.723627 | 0.611573 | 4.966039 |
| 59 | 13 | 0 | 6.350900 | 7.670725 | 3.158031 |
| 60 | 13 | 0 | 6.358853 | 4.830834 | 3.157165 |
| 61 | 13 | 0 | 4.732130 | 3.515235 | 4.968378 |
| 62 | 13 | 0 | 3.352830 | 4.875115 | 7.048746 |
| 63 | 13 | 0 | 7.561662 | 3.547000 | 1.017504 |
| 64 | 13 | 0 | 7.554628 | 0.582256 | 1.018627 |
| 65 | 13 | 0 | 3.357039 | 7.622336 | 7.050027 |
| 66 | 8  | 0 | 8.729244 | 2.060938 | 0.721320 |
| 67 | 8  | 0 | 6.090347 | 2.061803 | 5.265889 |
| 68 | 8  | 0 | 4.655303 | 6.247970 | 7.044538 |
| 69 | 8  | 0 | 7.512535 | 6.253958 | 3.103265 |
| 70 | 8  | 0 | 8.836552 | 4.811322 | 0.734984 |
| 71 | 8  | 0 | 8.832925 | 7.686758 | 0.734824 |
| 72 | 8  | 0 | 6.140680 | 7.735879 | 5.014508 |
| 73 | 8  | 0 | 6.144784 | 4.759909 | 5.012982 |
| 74 | 8  | 0 | 4.535165 | 3.385971 | 6.862920 |
| 75 | 8  | 0 | 4.529103 | 0.744060 | 6.861960 |
| 76 | 8  | 0 | 7.579449 | 0.676881 | 2.878875 |
| 77 | 8  | 0 | 7.609613 | 3.471680 | 2.878963 |
| 78 | 28 | 0 | 5.878535 | 2.060135 | 7.157951 |
| 79 | 13 | 0 | 7.043459 | 2.080134 | 3.749694 |
| 80 | 13 | 0 | 5.896985 | 6.247755 | 5.861436 |

sextet

|    |    |   |           |          |          |
|----|----|---|-----------|----------|----------|
| 1  | 13 | 0 | -0.547263 | 6.261996 | 0.928217 |
| 2  | 13 | 0 | -1.711831 | 6.239746 | 4.279534 |
| 3  | 13 | 0 | -0.565017 | 2.074900 | 2.187369 |
| 4  | 8  | 0 | -3.358877 | 6.261191 | 7.336525 |
| 5  | 8  | 0 | -0.718133 | 6.261642 | 2.787418 |
| 6  | 8  | 0 | 0.680821  | 2.073803 | 1.003816 |
| 7  | 8  | 0 | -2.126724 | 2.066503 | 4.965841 |
| 8  | 8  | 0 | -3.477799 | 3.519559 | 7.312966 |
| 9  | 8  | 0 | -3.473502 | 0.626247 | 7.311377 |
| 10 | 8  | 0 | -0.750172 | 0.587444 | 3.059886 |
| 11 | 8  | 0 | -0.758770 | 3.563599 | 3.058705 |
| 12 | 8  | 0 | 0.796450  | 4.980396 | 1.196387 |
| 13 | 8  | 0 | 0.801950  | 7.534303 | 1.196423 |
| 14 | 8  | 0 | -2.187270 | 7.641975 | 5.174893 |
| 15 | 8  | 0 | -2.223115 | 4.850311 | 5.175355 |
| 16 | 13 | 0 | 2.173351  | 6.254046 | 1.133989 |
| 17 | 13 | 0 | -2.626825 | 2.074013 | 6.713997 |
| 18 | 13 | 0 | -0.964348 | 0.649739 | 4.910354 |
| 19 | 13 | 0 | 0.676703  | 7.718763 | 3.125734 |
| 20 | 13 | 0 | 0.667482  | 4.798790 | 3.122761 |
| 21 | 13 | 0 | -0.975782 | 3.491830 | 4.909301 |
| 22 | 13 | 0 | -2.193618 | 4.776496 | 7.037584 |
| 23 | 13 | 0 | 1.979406  | 3.451248 | 0.994146 |
| 24 | 13 | 0 | 1.974391  | 0.694418 | 0.991285 |
| 25 | 13 | 0 | -2.185490 | 7.738136 | 7.035648 |
| 26 | 8  | 0 | 3.248378  | 2.071057 | 1.079489 |
| 27 | 8  | 0 | 0.462165  | 2.080999 | 5.058855 |
| 28 | 8  | 0 | -0.865692 | 6.254426 | 7.214364 |
| 29 | 8  | 0 | 1.917723  | 6.254861 | 3.033225 |
| 30 | 8  | 0 | 3.468976  | 4.963857 | 0.904619 |
| 31 | 8  | 0 | 3.475091  | 7.536407 | 0.901309 |
| 32 | 8  | 0 | 0.293834  | 7.571877 | 4.900062 |
| 33 | 8  | 0 | 0.242487  | 4.982144 | 4.888777 |
| 34 | 8  | 0 | -0.994343 | 3.345380 | 6.822908 |
| 35 | 8  | 0 | -0.989364 | 0.802262 | 6.825526 |
| 36 | 8  | 0 | 1.891760  | 0.673261 | 2.916604 |
| 37 | 8  | 0 | 1.885310  | 3.474905 | 2.921603 |
| 38 | 13 | 0 | 0.371789  | 2.077649 | 7.037867 |
| 39 | 13 | 0 | 1.972526  | 2.071243 | 4.024809 |
| 40 | 13 | 0 | 0.596390  | 6.268591 | 6.120810 |
| 41 | 13 | 0 | 4.998715  | 6.244935 | 1.030669 |
| 42 | 13 | 0 | 3.397861  | 6.251168 | 4.029668 |
| 43 | 13 | 0 | 4.754864  | 2.053831 | 1.941118 |

|    |    |   |          |          |          |
|----|----|---|----------|----------|----------|
| 44 | 8  | 0 | 2.102218 | 6.251291 | 6.985276 |
| 45 | 8  | 0 | 4.912315 | 6.241721 | 3.006867 |
| 46 | 8  | 0 | 6.227581 | 2.067539 | 0.858430 |
| 47 | 8  | 0 | 3.446389 | 2.067479 | 5.027360 |
| 48 | 8  | 0 | 1.890900 | 3.355353 | 7.164286 |
| 49 | 8  | 0 | 1.885656 | 0.789697 | 7.168579 |
| 50 | 8  | 0 | 5.094614 | 0.761477 | 3.171717 |
| 51 | 8  | 0 | 5.141963 | 3.331932 | 3.180897 |
| 52 | 8  | 0 | 6.362249 | 4.978238 | 1.243792 |
| 53 | 8  | 0 | 6.358046 | 7.518282 | 1.241504 |
| 54 | 8  | 0 | 3.483760 | 7.644336 | 5.135342 |
| 55 | 8  | 0 | 3.489472 | 4.852135 | 5.130169 |
| 56 | 13 | 0 | 7.984663 | 6.248013 | 1.344155 |
| 57 | 13 | 0 | 3.208479 | 2.068672 | 6.931371 |
| 58 | 13 | 0 | 4.707806 | 0.612849 | 4.960893 |
| 59 | 13 | 0 | 6.343861 | 7.673366 | 3.158976 |
| 60 | 13 | 0 | 6.354306 | 4.829246 | 3.159506 |
| 61 | 13 | 0 | 4.715724 | 3.513920 | 4.962890 |
| 62 | 13 | 0 | 3.366737 | 4.874589 | 7.064929 |
| 63 | 13 | 0 | 7.562036 | 3.545152 | 1.023654 |
| 64 | 13 | 0 | 7.554834 | 0.584064 | 1.026439 |
| 65 | 13 | 0 | 3.372550 | 7.623788 | 7.067922 |
| 66 | 8  | 0 | 8.729606 | 2.060577 | 0.727116 |
| 67 | 8  | 0 | 6.069384 | 2.060381 | 5.253192 |
| 68 | 8  | 0 | 4.672061 | 6.248143 | 7.067578 |
| 69 | 8  | 0 | 7.502923 | 6.254996 | 3.098512 |
| 70 | 8  | 0 | 8.843314 | 4.805509 | 0.751139 |
| 71 | 8  | 0 | 8.839470 | 7.692348 | 0.752594 |
| 72 | 8  | 0 | 6.130747 | 7.735126 | 5.009715 |
| 73 | 8  | 0 | 6.138484 | 4.757311 | 5.010436 |
| 74 | 8  | 0 | 4.532050 | 3.381442 | 6.861253 |
| 75 | 8  | 0 | 4.527135 | 0.749984 | 6.861104 |
| 76 | 8  | 0 | 7.568225 | 0.676847 | 2.884479 |
| 77 | 8  | 0 | 7.600237 | 3.472579 | 2.883489 |
| 78 | 28 | 0 | 5.877496 | 2.061883 | 7.149304 |
| 79 | 13 | 0 | 7.024559 | 2.081281 | 3.742175 |
| 80 | 13 | 0 | 5.891241 | 6.246582 | 5.860811 |
